# Supplementary material
Source: Elsevier journal article supplement (https://www.sciencedirect.com/science/article/pii/S0021755721000255)
Supplement: mmc1 [file S0021755721000255:mmc1.docx]

**Supplementary Material 1 - List of reports of the included studies (n = 143).**

| **Study** | **References** |
| --- | --- |
| Alexius 2012[17] | 1. Alexius SL, Olinto MTA, Henn RL, Pattussi MP. The association between self-perceptions of psychological well‐being and overweight in Brazilian children. Maternal & child nutrition. 2012;8(2):267-74. 2. Alexius SL. Prevalência de excesso de peso e fatores associados em crianças do município de Medianeira-PR. 2008. |
| Andaki 2017[18] | 1. Andaki ACR, Mendes EL, Tinoco ALA, Santos A, Sousa B, Vale S, et al. Waist circumference percentile in children from municipalities of developed and developing countries. Motriz: Rev Educ Fís. 2017;23(SPE2). 2. Andaki ACR. Predição do risco de síndrome metabólica em escolares de seis a 10 anos de idade por meio de curvas de referência de medidas antropométricas e composição corporal. 2013. |
| Ataíde Lima 2015[19] | 1. Ataíde Lima RP, de Carvalho Pereira D, Pordeus Luna RC, Gonçalves Mda C, de Lima RT, Filho MB, et al. BMI, overweight status and obesity adjusted by various factors in all age groups in the population of a city in Northeastern Brazil. Int J Environ Res Public Health. 2015;12:4422-38. doi: 10.3390/ijerph120404422. PMID: 25913186; PMCID: PMC4410256. |
| Barbosa 2009[20] | 1. Barbosa L. Características gestacionais e de nascimento e alimentação no primeiro ano de vida e sua relação com dislipidemias e excesso de peso em escolares [dissertação de mestrado]. Viçosa (MG): Universidade Federal de Viçosa. 2009. |
| Barbosa Filho 2016[21] | 1. Barbosa Filho VC, Campos Wd, Fagundes RR, Lopes AdS, Souza EAd. Presença isolada e combinada de indicadores antropométricos elevados em crianças: prevalência e fatores sociodemográficos associados. Cien Saude Colet. 2016;21:213-24. |
| Barreto 2007[22] | 1. Barreto ACdNG. Prevalência de excesso de peso em pré-escolares na cidade do Natal: Universidade Federal do Rio Grande do Norte; 2007. 2. Barreto ACdNG, Brasil LdMP, Maranhão HdS. Sobrepeso: uma nova realidade no estado nutricional de pré-escolares de Natal, RN. Revista da Associação Médica Brasileira. 2007;53(4):311-6. |
| Bernardo 2012[23] | 1. Bernardo CdO, Vasconcelos FdAGd. Association of parents' nutritional status, and sociodemographic and dietary factors with overweight/obesity in schoolchildren 7 to 14 years old. Cadernos de saude publica. 2012;28(2):291-304. |
| Berria 2013[25] | 1. Bertin RL, Malkowski J, Zutter LCI, Ulbrich AZ. Estado nutricional, hábitos alimentares e conhecimentos de nutrição em escolares. Rev Paul Pediatr. 2010;28(3):303-8. |
| Bertin 2010[24] | 1. Berria J, Minatto G, Ribeiro RR, Santos KD, Petroski EL. Prevalência de obesidade abdominal e fatores associados em crianças e adolescentes de Cascavel-PR, Brasil. Rev Educ Fís UEM. 2013;24:269-77. 2. Ferrari E, Minatto G, Berria J, dos S Silva S, Fidelix Y, Ribeiro R, et al. Body image dissatisfaction and anthropometric indicators in male children and adolescents. European journal of clinical nutrition. 2015;69(10):1140-4. |
| Borges 2007[26] | 1. de Camargo AT, Borges CR, Köhler MLK, de Lima Leite M, Fernandes AB, Kanunfre CC. Influência da televisão na prevalência de obesidade infantil em Ponta Grossa, Paraná. Ciência, Cuidado e Saúde. 2007;6(3):305-11. |
| Castilho 2014[27] | 1. Castilho SD, Nucci LB, Hansen LO, Assuino SR. Prevalence of weight excess according to age group in students from Campinas, SP, Brazil. Rev Paul Pediatr. 2014;32(2):200-6. |
| Chagas 2013[28] | 1. Chagas DCd, Silva AAMd, Batista RFL, Simoes VMF, Lamy ZC, Coimbra LC. Prevalence and factors associated to malnutrition and excess weight among under five year-olds in the six largest cities of Maranhão. Revista Brasileira de Epidemiologia. 2013;16:146-56. |
| Coelho 2012[29] | 1. Coelho LG, Cândido APC, Machado-Coelho GL, Freitas SNd. Association between nutritional status, food habits and physical activity level in schoolchildren. Jornal de pediatria. 2012;88(5):406-12. 2. Cândido APC, Benedetto R, Castro APP, Carmo JS, Nicolato RL, Nascimento-Neto RM, et al. Cardiovascular risk factors in children and adolescents living in an urban area of Southeast of Brazil: Ouro Preto Study. European journal of pediatrics. 2009;168(11):1373-82. 3. Cândido AP, Freitas SN, Machado‐Coelho GL. Anthropometric measurements and obesity diagnosis in schoolchildren. Acta paediatrica. 2011;100(9):e120-e4. 4. Cândido APC, Alosta J, Oliveira CTd, Freitas RNd, Freitas SNd, Machado-Coelho G. Anthropometric methods for obesity screening in schoolchildren; the Ouro Preto Study. Nutricion hospitalaria. 2012;27(1):146-53. |
| Costa 2015[30] | 1. Costa LdCF, Silva DAS, Almeida SdS, Vasconcelos FdAGd. Association between inaccurate estimation of body size and obesity in schoolchildren. Trends in psychiatry and psychotherapy. 2015;37(4):220-6. 2. Costa LdCF, Silva DAS, dos Santos Alvarenga M, de Vasconcelos FdAG. Association between body image dissatisfaction and obesity among schoolchildren aged 7–10 years. Physiology & behavior. 2016;160:6-11. 3. Motter AF, Correa E, Andrade D. Retail food outlets and the association with overweight/obesity in schoolchildren from Florianópolis, Santa Catarina State, Brazil. Cadernos de Saude Publica. 2015;31(3):620-32. 4. Rossi CE, Correa EN, Neves Jd, Gabriel CG, Benedet J, Rech CR, et al. Body mass index and association with use of and distance from places for physical activity and active leisure among schoolchildren in Brazil. Cross-sectional study. Sao Paulo Medical Journal. 2018;136(3):228-36. |
| Dallabona 2010[31] | 1. Dallabona A, Cabral SC, Höfelman DA. Variáveis infantis e maternas associadas à presença de sobrepeso em crianças de creches. Rev Paul Pediatr. 2010;28(4):304-13. 2. Giacomossi MC, Zanella T, Höfelmann DA. Percepção materna do estado nutricional de crianças de creches de cidade do Sul do Brasil. Rev Nutr. 2011;24(5):689-702. |
| Dumith 2010[32] | 1. Dumith SC, Farias Júnior JC. Sobrepeso e obesidade em crianças e adolescentes: comparação de três critérios de classificação baseados no índice de massa corporal. Revista Panamericana de Salud Pública. 2010;28:30-5. 2. Dumith SC, Farias JJ. Overweight and obesity in children and adolescents: Comparison of three classification criteria based on body mass index. Revista panamericana de salud publica= Pan American journal of public health. 2010;28(1):30-5. |
| Feltrin 2015[33] | 1. Feltrin GB, Vasconcelos FdAGd, Costa LdCF, Corso ACT. Prevalence and factors associated with central obesity in schoolchildren in Santa Catarina, Brazil. Rev Nutr. 2015;28(1):43-54. 2. Ricardo GD, Caldeira GV, Corso ACT. Prevalência de sobrepeso e obesidade e indicadores de adiposidade central em escolares de Santa Catarina, Brasil. Revista Brasileira de Epidemiologia. 2009;12(3):424-35. 3. Schmitz BdAS, Corso ACT, Caldeira GV, Gimeno SGA, Gabriel CG, de Vasconcelos FdAG. Overweight and obesity related factors in schoolchildren in Santa Catarina State, Brazil. Archivos latinoamericanos de nutricion. 2010;60(4):332-9. 4. Rossi CE, Costa LdCF, Machado MdS, Andrade DFd, Vasconcelos FdAGd. Fatores associados ao consumo alimentar na escola e ao sobrepeso/obesidade de escolares de 7-10 anos de Santa Catarina, Brasil. Cien Saude Colet. 2019;24:443-54. |
| Fernandez 2017[34] | 1. Fernandez MR, Goettems ML, Demarco FF, Correa MB. Is obesity associated to dental caries in Brazilian schoolchildren? Brazilian Oral Research. 2017;31. 2. Salas MMS, Vargas-Ferreira F, Nascimento GG, Huysmanns M-C, Demarco FF. Tooth erosion association with obesity: findings from a Brazilian survey in schoolchildren. Pesquisa Brasileira em Odontopediatria e Clinica Integrada. 2018;18(1):3764. 3. Goettems ML, Torriani DD, Hallal PC, Correa MB, Demarco FF. Dental trauma: prevalence and risk factors in schoolchildren. Community dentistry and oral epidemiology. 2014;42(6):581-90. |
| Ferrari 2015[35] | 1. de Moraes Ferrari GL, Araújo TL, Oliveira LC, Matsudo V, Fisberg M. Association between electronic equipment in the bedroom and sedentary lifestyle, physical activity, and body mass index of children. Jornal de Pediatria (Versão em Português). 2015;91(6):574-82. 2. de Moraes Ferrari GL, Matsudo V, Katzmarzyk PT, Fisberg M. Prevalence and factors associated with body mass index in children aged 9–11 years. Jornal de Pediatria (Versão em Português). 2017;93(6):601-9. 3. Ferrari GLdM, Araújo T, Oliveira LC, Matsudo VKR, Mire E, Barreira T, et al. Accelerometer-determined peak cadence and weight status in children from São Caetano do Sul, Brazil. Cien Saude Colet. 2017;22:3689-98. 4. Matsudo VKR, de Moraes Ferrari GL, Araújo TL, Oliveira LC, Mire E, Barreira TV, et al. Socioeconomic status indicators, physical activity, and overweight/obesity in Brazilian children. Rev Paul Pediatr (English Edition). 2016;34(2):162-70. 5. Muthuri SK, Onywera VO, Tremblay MS, Broyles ST, Chaput J-P, Fogelholm M, et al. Relationships between parental education and overweight with childhood overweight and physical activity in 9–11 year old children: Results from a 12-country study. PloS one. 2016;11(8):e0147746. |
| Ferreira 2010[36] | 1. Ferreira HdS, Vieira EDF, Cabral Junior CR, Queiroz MDRd. Aleitamento materno por trinta ou mais dias é fator de proteção contra sobrepeso em pré-escolares da região semiárida de Alagoas. Revista da Associação Médica Brasileira. 2010;56(1):74-80. 2. de Arruda Moreira M, Cabral PC, da Silva Ferreira H, de Lira PIC. Prevalence and factors associated with overweight and obesity in children under five in Alagoas, Northeast of Brazil; a population-based study. Nutricion hospitalaria. 2014;29(6):1320-6. |
| Ferreira 2013[37] | 1. Ferreira HdS, Cesar JA, Assunção MLd, Horta BL. Time trends (1992-2005) in undernutrition and obesity among children under five years of age in Alagoas State, Brazil. Cadernos de saude publica. 2013;29(4):793-800. |
| Ferreira 2015[38] | 1. Ferreira HS, Lúcio GMA, Assunção ML, Silva BCV, Oliveira JS, Florêncio TMM, et al. High blood pressure among students in public and private schools in Maceio, Brazil. PloS one. 2015;10(11):e0142982. |
| Fraiz 2019[39] | 1. Fraiz GM, Crispim SP, Montes GR, Gil GS, Morikava FS, Bonotto DV, et al. Excess body weight, snack limits and dental caries in Brazilian preschoolers: A population-based study. Pesquisa Brasileira em Odontopediatria e Clínica Integrada. 2019;19. |
| Freitas 2015[40] | 1. Freitas TPdDA, Silva LLSd, Teles GS, Peixoto MdRG, Menezes IHCF. Fatores associados à subestimação materna do peso da criança: um estudo de base populacional. Rev Nutr. 2015;28(4):397-407. 2. Crispim PAA, Peixoto MdRG, Jardim PCBV. Risk factors associated with high blood pressure in two-to five-year-old children. Arquivos brasileiros de cardiologia. 2014;102(1):39-46. |
| Gigante 2013[41] | 1. Gigante DP, Victora CG, Matijasevich A, Horta BL, Barros FC. Association of family income with BMI from childhood to adult life: a birth cohort study. Public health nutrition. 2013;16(2):233-9. 2. Barros AJ, Victora CG, Santos IS, Matijasevich A, Araújo CL, Barros FC. Infant malnutrition and obesity in three population-based birth cohort studies in Southern Brazil: trends and differences. Cadernos de Saúde Pública. 2008;24:s417-s26. 3. Barros FC, Victora CG. Maternal-child health in Pelotas, Rio Grande do Sul State, Brazil: major conclusions from comparisons of the 1982, 1993, and 2004 birth cohorts. Cadernos de saude publica. 2008;24:s461-s7. 4. Gonzalez D, Nazmi A, Victora C. Growth from birth to adulthood and abdominal obesity in a Brazilian birth cohort. International journal of obesity. 2010;34(1):195-202. 5. Victora CG, Barros FC, Lima RC, Behague DP, Gonçalves H, Horta BL, et al. the Pelotas birth cohort study, Rio Grande do Sul, Brazil, 1982-2001. Cadernos de saude publica. 2003;19(5):1241-56. 6. Victora CG, Barros FC. Cohort profile: the 1982 Pelotas (Brazil) birth cohort study. International journal of epidemiology. 2006;35(2):237-42. 7. Martínez J, Araújo C, Horta BL, Gigante DP. Growth patterns in early childhood and the onset of menarche before age twelve. Revista de saude publica. 2010;44(2):249-60. 8. Matijasevich A, Santos IS, Menezes AM, Barros AJ, Gigante DP, Horta BL, et al. Trends in socioeconomic inequalities in anthropometric status in a population undergoing the nutritional transition: data from 1982, 1993 and 2004 Pelotas birth cohort studies. BMC Public Health. 2012;12(1):511. 9. Quinte GC, Barros F, Gigante DP, de Oliveira IO, dos Santos Motta JV, Horta BL. Overweight trajectory and cardio metabolic risk factors in young adults. BMC pediatrics. 2019;19(1):75. 10. De Lucia Rolfe E, de França GVA, Vianna CA, Gigante DP, Miranda JJ, Yudkin JS, et al. Associations of stunting in early childhood with cardiometabolic risk factors in adulthood. PloS one. 2018;13(4):e0192196. 11. Kolle E, Horta BL, Wells J, Brage S, Barros FC, Ekelund U, et al. Does objectively measured physical activity modify the association between early weight gain and fat mass in young adulthood? BMC Public Health. 2017;17(1):1-7. |
| Guedes 2011[42] | 1. Guedes DP, Rocha GD, Silva AJRM, Carvalhal IM, Coelho EM. Effects of social and environmental determinants on overweight and obesity among Brazilian schoolchildren from a developing region. Revista Panamericana de Salud Pública. 2011;30:295-302. 2. Guedes DP, Mendes RR. Crescimento físico e estado nutricional de escolares do Vale do Jequitinhonha, Minas Gerais, Brasil. Revista Brasileira de Cineantropometria & Desempenho Humano. 2012;14(4):363-76. |
| Heleno 2017[43] | 1. Heleno P, Emerick L, Mourao N, Pereira D, Santos I, Oliveira ASd, et al. Systemic arterial hypertension, blood pressure levels and associated factors in schoolchildren. Revista da Associação Médica Brasileira. 2017;63(10):869-75. |
| Justo 2012[44] | 1. Justo G, Callo G, Carletti L, Molina MC. Nutritional extremes among school children in a rural Brazilian municipality. 2012. |
| Kupek 2016[45] | 1. Kupek E, Lobo AS, Leal DB, Bellisle F, de Assis MAA. Dietary patterns associated with overweight and obesity among Brazilian schoolchildren: an approach based on the time-of-day of eating events. British Journal of Nutrition. 2016;116(11):1954-65. 2. Benedet J, da Silva Lopes A, Adami F, de Fragas Hinnig P, de Vasconcelos FdAG. Association of sexual maturation with excess body weight and height in children and adolescents. BMC pediatrics. 2014;14(1):72. 3. Pudla KJ, Gonzaléz-Chica DA, Vasconcelos FdAGd. Efeito do aleitamento materno sobre a obesidade em escolares: influência da escolaridade da mãe. Rev Paul Pediatr. 2015;33:294-301. 4. Biazzi Leal D, Altenburg de Assis MA, Hinnig PdF, Schmitt J, Soares Lobo A, Bellisle F, et al. Changes in dietary patterns from childhood to adolescence and associated body adiposity status. Nutrients. 2017;9(10):1098. |
| Leal 2017[46] | 1. Leal D, Maria DAA, Lobo A, Hinnig P, Engel R, Soar C, editors. Trends In The Prevalence Of Overweight And Obesity Among Brazilian School-Children, 2002, 2007, And 2012/13. Annals Of Nutrition And Metabolism; 2017: Karger Allschwilerstrasse 10, Ch-4009 Basel, Switzerland. 2. Leal DB. Mudanças de adiposidade em escolares de 7 a 10 anos e rastreamento do excesso de peso da infância para a adolescência: um estudo transversal e longitudinal. 2015. 3. Leal DB, Assis MAAd, Conde WL, Lobo AS, Bellisle F, Andrade DFd. Individual characteristics and public or private schools predict the body mass index of Brazilian children: a multilevel analysis. Cadernos de saude publica. 2018;34:e00053117. 4. Leal DB, de Assis MAA, González-Chica DA, da Costa FF. Trends in adiposity in Brazilian 7–10-year-old schoolchildren: evidence for increasing overweight but not obesity between 2002 and 2007. Annals of Human Biology. 2014;41(3):255-62. 5. Silva DA. Prevalência de sobrepeso e obesidade em pré-escolares de alto nível sócioeconômico da cidade de Aracaju-se. Medicina (Ribeirao Preto Online). 2008;41(2):177-81. 6. De Assis M, Rolland-Cachera MF, Grosseman S, de Vasconcelos F, Luna MEP, Calvo M, et al. Obesity, overweight and thinness in schoolchildren of the city of Florianopolis, Southern Brazil. European journal of clinical nutrition. 2005;59(9):1015-21. |
| Menezes 2007[47] | 1. Menezes AM, Hallal PC, Muiño A, Chatkin M, Araújo CL, Barros FC. Risk factors for wheezing in early adolescence: a prospective birth cohort study in Brazil. Annals of Allergy, Asthma & Immunology. 2007;98(5):427-31. 2. Gigante DP, Victora CG, Araújo CLP, Barros FC. Tendências no perfil nutricional das crianças nascidas em 1993 em Pelotas, Rio Grande do Sul, Brasil: análises longitudinais. Cadernos de Saúde Pública. 2003;19:S141-S7. 3. Post CL, Victora CG, Barros FC, Horta BL, Guimarães PR. Desnutrição e obesidade infantis em duas coortes de base populacional no Sul do Brasil: tendências e diferenciais. Cadernos de Saúde Pública. 1996;12:S49-S57. 4. Santos IS, Matijasevich A, Valle NC, Gigante DP, De Moura DR. Milk thickeners do not influence anthropometric indices in childhood. Food and nutrition bulletin. 2006;27(3):245-51. 5. Wells J, Hallal P, Wright A, Singhal A, Victora C. Fetal, infant and childhood growth: relationships with body composition in Brazilian boys aged 9 years. International journal of obesity. 2005;29(10):1192-8. 6. Wells JC, Dumith SC, Ekelund U, Reichert FF, Menezes AM, Victora CG, et al. Associations of intrauterine and postnatal weight and length gains with adolescent body composition: prospective birth cohort study from Brazil. Journal of Adolescent Health. 2012;51(6):S58-S64. 7. Araujo C, Victora C, Hallal P, Gigante D. Breastfeeding and overweight in childhood: evidence from the Pelotas 1993 birth cohort study. International journal of obesity. 2006;30(3):500-6. 8. Gonçalves H, Barros FC, Buffarini R, Horta BL, Menezes AM, Barros AJ, et al. Infant nutrition and growth: trends and inequalities in four population-based birth cohorts in Pelotas, Brazil, 1982–2015. International journal of epidemiology. 2019;48(Supplement_1):i80-i8. |
| Moreira 2012[48] | 1. Moreira MdA, Cabral PC, Ferreira HdS, de Lira PI. Overweight and associated factors in children from northeasten Brazil. Jornal de pediatria. 2012;88(4):347-52. 2. de Arruda Moreira M. Associação entre fatores socioeconômicos, maternos e biológicos com o excesso de peso em menores de cinco anos de uma região semiárida do nordeste brasileiro: Universidade Federal de Pernambuco; 2010. |
| Müller 2014[49] | 1. Müller RdM, Tomasi E, Facchini LA, Piccini RX, Silveira DSd, Siqueira FV, et al. Prevalence of overweight and associated factors in under-five-year-old children in urban population in Brazil. Revista Brasileira de Epidemiologia. 2014;17:285-96. |
| Nobre 2013[50] | 1. Nobre LN, Silva KC, de Castro Ferreira SE, Moreira LL, do Carmo Lessa A, Lamounier JA, et al. Early determinants of overweight and obesity at 5 years old in preschoolers from inner of Minas Gerais, Brazil. Nutricion hospitalaria. 2013;28(3):764-71. 2. Lessa ADC, Fonseca LB, Nobre LN, Assis AMDO. Dietary Patterns of Children during the First Year of Life: A Cohort Study—Dietary Patterns of Children. Food and Nutrition Sciences. 2017;8(11):1001. 3. Nobre LN, Lamounier JA, do CC Franceschini S. Sociodemographic, anthropometric and dietary determinants of dyslipidemia in preschoolers. Jornal de pediatria. 2013;89(5):462-9. 4. Nobre LN, Lamounier JA, Franceschini SC. Preschool children dietary patterns and associated factors. Jornal de Pediatria. 2012;88(2):129-36. 5. Silva KC, Nobre LN, Vicente SEdCF, Moreira LL, do Carmo Lessa A, Lamounier JA. Influência do índice glicêmico e carga glicêmica da dieta sobre o risco de sobrepeso e adiposidade na infância. Rev Paul Pediatr. 2016;34(3):293-300. |
| Nogueira 2014[51] | 1. Nogueira LYT. Estado nutricional e associação com variáveis comportamentais e socioeconômicas em escolares do município de Ourinhos-SP. 2014. |
| Oliveira 2003[52] | 1. Oliveira AMAd, Cerqueira EdM, Oliveira ACd. Prevalência de sobrepeso e obesidade infantil na cidade de Feira de Santana-BA: detecção na família x diagnóstico clínico. Jornal de pediatria. 2003;79(4):325-8. 2. Oliveira AMAd, Cerqueira EMM, Souza JdS, Oliveira ACd. Sobrepeso e obesidade infantil: influência de fatores biológicos e ambientais em Feira de Santana, BA. Arquivos Brasileiros de Endocrinologia & Metabologia. 2003;47:144-50. 3. Oliveira AM, Oliveira AC, Almeida MS, Oliveira N, Adan L. Influence of the family nucleus on obesity in children from northeastern Brazil: a cross-sectional study. BMC Public Health. 2007;7(1):235. 4. Oliveira AMAd, Oliveira ACd, Almeida MSd, Almeida FSd, Ferreira JB, Silva CE, et al. Fatores ambientais e antropométricos associados à hipertensão arterial infantil. Arquivos Brasileiros de Endocrinologia & Metabologia. 2004;48(6):849-54. |
| Oliveira 2015[53] | 1. Oliveira AM, Veneza LM, Marques Da Silva CC, Cardoso De Oliveira AL, Santos ADS, Oliveira A, et al., editors. A Decade Trend of Childhood Obesity in a Developing Country, 2001 to 2011. Diabetes; 2015: Amer Diabetes Assoc 1701 N Beauregard St, Alexandria, Va 22311-1717 Usa. |
| Opptiz 2014[54] | 1. Oppitz IN, Cesar JA, Neumann NA. Overweight among children under five years of age in municipalities of the semiarid region. Revista Brasileira de Epidemiologia. 2014;17:860-72. 2. Ramos CV, Dumith SC, César JA. Prevalence and factors associated with stunting and excess weight in children aged 0-5 years from the Brazilian semi-arid region. Jornal de Pediatria. 2015;91(2):175-82. |
| PNDS 2006[67] | 1. Saúde Md. Pesquisa Nacional de Demografia e Saúde da Criança e da Mulher-PNDS 2006: dimensões do processo reprodutivo e da saúde da criança. Ministério da Saúde Brasília; 2009. 2. Cocetti M, de AC Taddei JA, Konstantyner T, de Oliveira Konstantyner TCR, de Azevedo Barros Filho A. Prevalence and factors associated with overweight among Brazilian children younger than 2 years. Jornal de pediatria. 2012;88(6):503-8. 3. Géa‐Horta T, Felisbino‐Mendes MS, Ortiz RJF, Velasquez‐Melendez G. Association between maternal socioeconomic factors and nutritional outcomes in children under 5 years of age. Jornal de Pediatria (Versão em Português). 2016;92(6):574-80. 4. Horta TG, Silva RdCR, Fiaccone RL, Barreto ML, Meléndez GV. Factors associated with body mass index in Brazilian children: structural equation model. 2017. 5. Meller FdO. Fatores associados ao sobrepeso em crianças brasileiras menores de cinco anos: PNDS-2006: Universidade Federal de Pelotas; 2011. 6. Meller FdO, Araújo CLP, Madruga SW. Fatores associados ao excesso de peso em crianças brasileiras menores de cinco anos. Cien Saude Colet. 2014;19:943-55. 7. Silveira JAC, Colugnati FAB, Cocetti M, Taddei JAA. Secular trends and factors associated with overweight among Brazilian preschool children: PANS-1989, PNDS-1996, and 2006/07. Jornal de pediatria. 2014;90(2):258-66. 8. Silveira J, Colugnati F, Poblacion A, Taddei J. The role of exclusive breastfeeding and sugar‐sweetened beverage consumption on preschool children's weight gain. Pediatric obesity. 2015;10(2):91-7. 9. Vega JB, Poblacion AP, Taddei JAdAC. Fatores associados ao consumo de bebidas açucaradas entre pré-escolares brasileiros: inquérito nacional de 2006. Cien Saude Colet. 2015;20:2371-80. |
| POF 2003[66] | 1. IBGE CD. Pesquisa de Orçamentos Familiares–POF 2002/2003. 2000. 2. Canella DS, Levy RB, Martins APB, Claro RM, Moubarac J-C, Baraldi LG, et al. Ultra-processed food products and obesity in Brazilian households (2008–2009). PloS one. 2014;9(3):e92752. 3. Canella DS, Novaes HM, Levy RB. Medicine expenses and obesity in Brazil: an analysis based on the household budget survey. BMC Public Health. 2015;16(1):54. 4. Canella DS, Novaes HMD, Levy RB. Influência do excesso de peso e da obesidade nos gastos em saúde nos domicílios brasileiros. Cadernos de Saúde Pública. 2015;31:2331-41. 5. Severi C, Medina M, Moratorio X, Natero Felipe MV, Barreto P, editors. Malnutrition in all its forms and socioeconomic status in Uruguay. Annals of Nutrition And Metabolism; 2017: Karger Allschwilerstrasse 10, Ch-4009 Basel, Switzerland. 6. Almeida ATCd, Netto Júnior JLdS. Medidas de transmissão intergeracional da obesidade no Brasil. Cien Saude Colet. 2015;20:1401-13. 7. Silva IFd. Um retrato do estado nutricional de crianças menores de 5 anos e idosos: diferenciais regionais sociais e demográficos, Brasil, 2009: Universidade Federal do Rio Grande do Norte; 2014. 8. Sousa CAd, César CLG, Barros MBdA, Carandina L, Goldbaum M, Pereira JCR. Doenças respiratórias e fatores associados: estudo de base populacional em São Paulo, 2008-2009. Revista de Saúde Pública. 2011;46:16-25. |
| POF 2009[65] | 1. IBGE. Microdados da POF 2008-2009 (Pesquisa de Orçamentos Familiares). IBGE Rio de Janeiro; 2010. |
| PPV 1997[64] | 1. IBGE. Pesquisa sobre padrões de vida 1996-1997. IBGE Rio de Janeiro; 1999. 2. Abrantes MM, Lamounier JA, Colosimo EA. Prevalência de sobrepeso e obesidade em crianças e adolescentes das regiões Sudeste e Nordeste. Jornal de pediatria. 2002;78(4):335-40. 3. Abrantes MM, Lamounier JA, Colosimo EA. Recommendations for the use of body mass index for the classification of overweight and obese children and adolescents. Food and nutrition bulletin. 2002;23(3):262-6. 4. Abrantes MM, Lamounier JA, Colosimo EA. Prevalência de sobrepeso e obesidade nas regiões Nordeste e Sudeste do Brasil. Revista da Associação Médica Brasileira. 2003;49(2):162-6. 5. Burlandy L, Anjos LAd. Acesso à alimentação escolar e estado nutricional de escolares no Nordeste e Sudeste do Brasil, 1997. Cadernos de Saúde Pública. 2007;23:1217-26. |
| Pretto 2014[55] | 1. Doumid Borges Pretto A, Correa Kaufmann C, Ferreira Dutra G, Pinto Albernaz E. Prevalence of factors related to the bone mass formation of children from a cohort in Southern Brazil. Nutr Hosp. 2014;31(3):1122-8. 2. Pretto ADB, Correa Kaufmann C, Ferreira Dutra G, Pinto Albernaz E. Prevalence of factors associated to metabolic syndrome in a cohort of children in South Brazil. Nutricion hospitalaria. 2015;32(1):118-23. 3. Dutra GF, Kaufmann CC, Pretto AD, Albernaz EP. Television viewing habits and their influence on physical activity and childhood overweight. Jornal de pediatria. 2015;91(4):346-51. 4. Dutra GF, Kaufmann CC, Pretto ADB, Albernaz EP. Sedentary lifestyle and poor eating habits in childhood: a cohort study. Cien Saude Colet. 2016;21:1051-9. |
| Ramalho 2013[56] a | 1. Ramalho AA, Mantovani SAS, Delfino BM, Pereira TM, Martins AC, Oliart-Guzmán H, et al. Nutritional status of children under 5 years of age in the Brazilian Western Amazon before and after the Interoceanic highway paving: a population-based study. BMC Public Health. 2013;13(1):1098. |
| Rocha 2019[63] | 1. Rocha NP, Milagres LC, Filgueiras MDS, Suhett LG, Silva MA, Albuquerque FMd, et al. Association of dietary patterns with excess weight and body adiposity in Brazilian children: the pase-brasil study. Arquivos Brasileiros de Cardiologia. 2019;113(1):52-9. 2. Castro APP, Hermsdorff HHM, Milagres LC, Albuquerque FMd, Filgueiras MdS, Rocha NP, et al. Increased ApoB/ApoA1 ratio is associated with excess weight, body adiposity, and altered lipid profile in children. Jornal de Pediatria. 2019;95(2):238-46. 3. Suhett LG, Silveira BKS, Filgueiras MDS, Peluzio MdCG, Hermsdorff HHM, de Novaes JF. Inverse association of calcium intake with abdominal adiposity and C-reactive protein in Brazilian children. Public health nutrition. 2018;21(10):1912-20. 4. Suhett LG, Hermsdorff HHM, Rocha NP, Silva MA, Filgueiras MDS, Milagres LC, et al. Increased C-reactive protein in Brazilian children: association with cardiometabolic risk and metabolic syndrome components (PASE study). Cardiology Research and Practice. 2019;2019. |
| Salomons 2007[57] | 1. Salomons E, Rech CR, Loch MR. Nutritional status of six to ten-year-old schoolchildren in the municipal education system of arapoti, Paraná, Brazil. 2007. 2007;9(3):6. |
| Santos 2019[58] | 1. Santos LP, Santos IS, Matijasevich A, Barros AJD. Changes in overall and regional body fatness from childhood to early adolescence. Scientific Reports. 2019;9(1):1888. 2. Santos LP, Assunção MCF, Matijasevich A, Santos IS, Barros AJ. Dietary intake patterns of children aged 6 years and their association with socioeconomic and demographic characteristics, early feeding practices and body mass index. BMC Public Health. 2016;16(1):1055. 3. Santos L, Ong K, Day F, Wells J, Matijasevich A, Santos I, et al. Body shape and size in 6-year old children: assessment by three-dimensional photonic scanning. International Journal of Obesity. 2016;40(6):1012-7. 4. Cruz SHd. O excesso de peso na infância e sua associação com problemas de comportamento, fatores sociodemográficos e biológicos: estudo dos 4 aos 6-7 anos de uma coorte de nascimentos. 2015. 5. da Silva IC, van Hees VT, Ramires VV, Knuth AG, Bielemann RM, Ekelund U, et al. Physical activity levels in three Brazilian birth cohorts as assessed with raw triaxial wrist accelerometry. International journal of epidemiology. 2014;43(6):1959-68. 6. Halal CS, Matijasevich A, Howe LD, Santos IS, Barros FC, Nunes ML. Short sleep duration in the first years of life and obesity/overweight at age 4 years: a birth cohort study. The Journal of pediatrics. 2016;168:99-103. e3. 7. Buffarini R, Barros AJ, Matijasevich A, de Mola CL, Santos IS. Gestational diabetes mellitus, pre-gestational BMI and offspring BMI z-score during infancy and childhood: 2004 Pelotas Birth Cohort. BMJ open. 2019;9(7):e024734. 8. Guttier MC, Barcelos RS, Ferreira RW, Bortolotto CC, Dartora WJ, Schmidt MI, et al. Repeated high blood pressure at 6 and 11 years at the Pelotas 2004 birth cohort study. BMC public health. 2019;19(1):1260. |
| Silva 2018[59] | 1. Silva APd, Feilbelmann TCM, Silva DC, Palhares HMC, Scatena LM, Resende EAMRd, et al. Prevalence of overweight and obesity and associated factors in school children and adolescents in a medium-sized Brazilian city. Clinics. 2018;73. |
| Strufaldi 2011[60] | 1. Strufaldi MWL, Silva EMKd, Puccini RF. Sobrepeso e obesidade em escolares pré-púberes: associação com baixo peso ao nascer e antecedentes familiares para doença cardiovascular. Embu região metropolitana de São Paulo, 2006. Cien Saude Colet. 2011;16:4465-72. 2. Strufaldi MWL, Da Silva EMK, Puccini RF. Metabolic syndrome among prepubertal Brazilian schoolchildren. Diabetes and Vascular Disease Research. 2008;5(4):291-7. |
| Travi 2012[61] | 1. Travi MIC, de Oliveira Bastos PRH, Pontes ERJC. Prevalência de sobrepeso, obesidade e circunferência abdominal alterada em escolares de 6 a 11 anos de idade em Campo Grande/MS. Revista Brasileira em Promoção da Saúde. 2012;24(1):54-62. |
| Villa 2014[62] | 1. Villa JKD. Padrões alimentares e escore de síndrome metabólica em crianças de 8 e 9 anos do município de Viçosa, Minas Gerais. 2014. 2. Magalhães EIdS. Relação da ingestão de macro e micronutrientes com fatores de risco cardiovasculares em crianças de Viçosa-MG. 2014. |

a One publication reported results of two studies, held in 2003 and 2010.

**Supplementary Material 2 - Reason for exclusion of reports assessed for data extraction (n = 222).**

| **Study did not report all needed data and/or did not sent enough data after request (n = 109)** |
| --- |
| 1. de Abreu RBF. Prevalência do excesso de peso em escolares do município de Belo Horizonte/MG-2ª fase do estudo do coração de Belo Horizonte. 2013. |
| 1. Almeida CAN, Ramos APP, João CA, et al. Jardinópolis sem anemia, primeira fase: avaliação antropométrica e do estado nutricional de ferro. Rev Paul Pediatr 2007;25(3):254-57. |
| 1. Andrade DEGd. Prevalência de sobrepeso e obesidade em crianças de escolas públicas e privadas do ensino fundamental da cidade de Franca-SP e alguns fatores de risco associados. Universidade de São Paulo, 2006. |
| 1. Anjos LAd, Castro IRRd, Engstrom EM, et al. Crescimento e estado nutricional em amostra probabilística de escolares no Município do Rio de Janeiro, 1999. Cadernos de Saúde Pública 2003;19:S171-S79. |
| 1. Assis MAAd, Rolland-Cachera MF, Vasconcelos FdAGd, et al. Overweight and thinness in 7-9 year old children from Florianópolis, Southern Brazil: a comparison with a French study using a similar protocol. Rev Nutr 2006;19(3):299-308. |
| 1. Augusto RA, Cobayashi F, Cardoso MA. Associations between low consumption of fruits and vegetables and nutritional deficiencies in Brazilian schoolchildren. Public Health Nutrition 2015;18(5):927-35. |
| 1. Azambuja APdO, Oliveira ERN, Azambuja MdA, et al. Prevalência e fatores associados ao excesso de peso em escolares. Rev baiana saúde pública 2012 |
| 1. Azambuja APdO, Netto-Oliveira ER, Oliveira AABd, et al. Prevalência de sobrepeso/obesidade e nível econômico de escolares. Rev Paul Pediatr 2013;31(2):166-71. |
| 1. Wellington Oliveira Barros J. Programação fetal e aptidão física em crianças dos 07 aos 09 anos de idade do município de Vitória de Santo Antão-PE. Universidade Federal de Pernambuco, 2011. |
| 1. Baruki SBS. Estado nutricional e atividade física em escolares de 7 a 10 anos da rede municipal de ensino de Corumbá-MS. 2004 |
| 1. Batista da Silva J, de Melo EM, Micussi MT, et al. Prevalência da síndrome metabólica nos estágios pubertários de escolares do sexo feminino. Revista de Salud Pública 2016;18:425-36 |
| 1. Bergmann GG, de Araújo Bergmann ML, Hallal PC. Independent and combined associations of cardiorespiratory fitness and fatness with cardiovascular risk factors in Brazilian youth. Journal of Physical Activity and Health 2014;11(2):375-83. |
| 1. Bettiol H, Sabbag Filho D, Haeffner L, et al. Do intrauterine growth restriction and overweight at primary school age increase the risk of elevated body mass index in young adults? Brazilian Journal of Medical and Biological Research 2007;40(9):1237-43. |
| 1. Bruscato NM, Pitrez Filho MS, Romor Vargas LT, et al. A prevalência de obesidade na infância e adolescência é maior em escolas públicas no sul do Brasil. Nutrición clínica y dietética hospitalaria 2016;36(4):59-64. |
| 1. Bueno MB, Marchioni DML, Fisberg RM. Evolução nutricional de crianças atendidas em creches públicas no Município de São Paulo, Brasil. Revista Panamericana de Salud Pública 2003;14:165-70. |
| 1. Caldeira KMS. Excesso de peso e sua relação com a duração do aleitamento materno em pré-escolares de um município de Minas Gerais, MG. Universidade de São Paulo, 2013. |
| 1. Pereira PB, Arruda IKGd, Cavalcanti AMTdS, et al. Perfil lipídico em escolares de Recife-PE. Arquivos Brasileiros de Cardiologia 2010;95(5):606-13. |
| 1. Cordeiro JP, Dalmaso SB, Anceschi SA, et al. Hipertensão em estudantes da rede pública de Vitória/ES: influência do sobrepeso e obesidade. Revista Brasileira de Medicina do Esporte 2016;22(1):59-65. |
| 1. Coronelli CLS, Moura ECd. Hipercolesterolemia em escolares e seus fatores de risco. Revista de Saúde Pública 2003;37:24-31. |
| 1. Costa RFd, Cintra IdP, Fisberg M. Prevalência de sobrepeso e obesidade em escolares da cidade de Santos, SP. Arquivos Brasileiros de Endocrinologia & Metabologia 2006;50(1):60-67. |
| 1. Costa C, Machado E, Colli C, et al. Anemia em pré-escolares atendidos em creches de São Paulo (SP): perspectivas decorrentes da fortificação das farinhas de trigo e de milho* Anemia in pre-school children attending day care centers of São Paulo: perspectives of the wheat. CEP 2009;1246:904. |
| 1. Costa PdB. Prevalência de sobrepeso e obesidade e sua associação com polimorfismos em escolares. Universidade Federal de Pelotas, 2017. |
| 1. Silva ACPd, Rosa AAA. Blood pressure and obesity of children and adolescents association with body mass index and waist circumference. Archivos latinoamericanos de nutrición Caracas Vol 56, no 3 (Sept 2006), p 244-250 2006. |
| 1. De Assis M, Rolland-Cachera M, de Vasconcelos F, et al. Central adiposity in Brazilian schoolchildren aged 7–10 years. British journal of nutrition 2007;97(4):799-805. |
| 1. Macêdo SFd, Araújo MFMd, Marinho NPB, et al. Fatores de risco para diabetes mellitus tipo 2 em crianças. Revista Latino-Americana de Enfermagem 2010;18(5):936-42. |
| 1. Ramos de Marins VM, Almeida RMVR, Pereira RA, et al. Overweight and risk of overweight in schoolchildren in the city of Rio de Janeiro, Brazil: prevalence and characteristics. Annals of tropical paediatrics 2002;22(2):137-44. |
| 1. Fernandes MdM, Penha DSG, Braga FdA. Obesidade infantil em crianças da rede pública de ensino: prevalência e consequências para flexibilidade, força explosiva e velocidade. Revista da Educação Física/UEM 2012;23(4):629-34. |
| 1. De Novaes JF, Priore SE, do Carmo Castro Franceschini S, et al. Does the body mass index reflect cardiovascular risk factors in Brazilian children? Journal of tropical pediatrics 2013;59(1):43-48. |
| 1. Quadros TMBd, Silva RCRd, Gordia AP, et al. Excesso de peso em crianças: comparação entre o critério internacional e nacional de classificação do índice de massa corpórea. Rev Paul Pediatr 2012;30(4):537-43. |
| 1. dos Santos FK, Moura dos Santos MA, Almeida MB, et al. Biological and behavioral correlates of body weight status among rural Northeast Brazilian schoolchildren. American Journal of Human Biology 2018;30(3):e23096. |
| 1. dos Santos Rocha A, de Cássia Ribeiro-Silva R, Nunes de Oliveira Costa G, et al. Food Consumption as a Modifier of the Association between LEPR Gene Variants and Excess Body Weight in Children and Adolescents: A Study of the SCAALA Cohort. Nutrients 2018;10(8):1117. |
| 1. Drachler MdL, Macluf SPZ, Leite JCdC, et al. Fatores de risco para sobrepeso em crianças no Sul do Brasil. Cadernos de Saúde Pública 2003;19(4):1073-81. |
| 1. Fagundes ALN, Ribeiro DC, Naspitz L, et al. Prevalência de sobrepeso e obesidade em escolares da região de Parelheiros do município de São Paulo. Rev Paul Pediatr 2008;26(3):212-17. |
| 1. Ferreira HS, Moura FA, Júnior CRC, et al. Short stature of mothers from an area endemic for undernutrition is associated with obesity, hypertension and stunted children: a population-based study in the semi-arid region of Alagoas, Northeast Brazil. British journal of nutrition 2008;101(8):1239-45. |
| 1. Ferreira JS, Aydos RD. Prevalência de hipertensão arterialem crianças e adolescentes obesos. Ciência & Saúde Coletiva 2010;15:97-104. |
| 1. Ferreira AP, Ferreira CB, Brito CJ, et al. Predição da síndrome metabólica em crianças por indicadores antropométricos. Arquivos brasileiros de cardiologia 2011;96(2):121-25. |
| 1. Ferreira HdS, Luciano SCM. Prevalência de extremos antropométricos em crianças do estado de Alagoas. Revista de Saúde Pública 2010;44(2):377-80. |
| 1. Fiaminghi DC. Variação temporal do excesso de peso em crianças matriculadas em Escolas Municipais de Educação Infantil de Porto Alegre e análise da alimentação escolar (2006-2013). 2015 |
| 1. Frainer DES, Vasconcelos FdAGd, Costa LdCF, et al. Distribuição da gordura corporal em escolares: um estudo usando o método LMS. Revista Brasileira de Medicina do Esporte 2013;19(5):317-22. |
| 1. Fuly JTB, Giovaninni NPB, Marcato DG, et al. Evidence of underdiagnosis and markers of high blood pressure risk in children aged 6 to 13 years. Jornal de pediatria 2014;90(1):65-70. |
| 1. Granville-Garcia AF, Menezes VAd, Lira PId, et al. Obesity and dental caries among preschool children in Brazil. Revista de Salud Pública 2008;10:788-95. |
| 1. Giovaninni NP, Fuly JT, Moraes LI, et al. Study of the association between 3111T/C polymorphism of the CLOCK gene and the presence of overweight in schoolchildren. Jornal de Pediatria (Versão em Português) 2014;90(5):500-05. |
| 1. Giuliano I, Freitas S, Coutinho M, et al. Distribution of HDL–cholesterol and non-HDL–cholesterol in Brazilian children and adolescents–The Floripa study. Nutrition, Metabolism and Cardiovascular Diseases 2011;21(1):33-38. |
| 1. Goldani MZ, Barbieri MA, da Silva AAM, et al. Cesarean section and increased body mass index in school children: two cohort studies from distinct socioeconomic background areas in Brazil. Nutrition Journal 2013;12(1):104. |
| 1. Granville‐Garcia AF, De Menezes VA, De Lira PIC. Dental trauma and associated factors in Brazilian preschoolers. Dental traumatology 2006;22(6):318-22. |
| 1. Granville-Garcia AF, Menezes VAd, Lira PICd, et al. Prevalência de sobrepeso e obesidade em pré-escolares de escolas públicas e privadas em Recife, Pernambuco, Brasil. Cad saúde colet,(Rio J) 2009 |
| 1. Guedes DP, Miranda Neto JT, Almeida MJ, et al. Impacto de fatores sociodemográficos e comportamentais na prevalência de sobrepeso e obesidade de escolares. Revista Brasileira de Cineantropometria & Desempenho Humano 2010;12(4):221-31. |
| 1. Guimarães LV, Barros M. As diferenças de estado nutricional em pré-escolares de rede pública e a transição nutricional. Jornal de Pediatria 2001 |
| 1. Guimarães LV. Estado nutricional e fatores associados ao sobrepeso em escolares da área urbana de Cuiabá-MT. 2001 |
| 1. Hobold E, Arruda M. Prevalência de sobrepeso e obesidade em estudantes: relações com nível socioeconômico, sexo e idade. Rec Bras Cineantropom Desempenho Hum [Internet]. 2015 [cited 2016 Dec 15]; 17 (2): 156-64, 2017. |
| 1. Jesus GMd, Vieira GO, Vieira TO, et al. Determinants of overweight in children under 4 years of age. Jornal de pediatria 2010;86(4):311-16. |
| 1. Krinski K, Elsangedy HM, Hora Sd, et al. Estado nutricional e associação do excesso de peso com gênero e idade de crianças e adolescentes. Revista Brasileira de Cineantropometria & Desempenho Humano 2011;13(1):29-35. |
| 1. Leão LS, Araújo LMB, Moraes LT, et al. Prevalência de obesidade em escolares de Salvador, Bahia. Arquivos Brasileiros de Endocrinologia & Metabologia 2003;47(2):151-57. |
| 1. Ledo DL, Suano-Souza FI, Maria do Carmo PF, et al. Body Mass Index and Cardiovascular Risk Factors in Children and Adolescents with High Birth Weight. Annals of Nutrition and Metabolism 2018;72(4):272-78. |
| 1. Matos SM, Jesus SR, Saldiva SR, et al. Overweight, asthma symptoms, atopy and pulmonary function in children of 4–12 years of age: findings from the SCAALA cohort in Salvador, Bahia, Brazil. Public health nutrition 2011;14(7):1270-78. |
| 1. Mazaro IAR. Prevalência de obesidade e hipertensão arterial e associação com fatores de risco em escolares da cidade de Sorocaba, São Paulo, Brasil. 2011 |
| 1. Mello ADM, Marcon SS, Hulsmeyer APC, et al. Prevalência de sobrepeso e obesidade em crianças de seis a dez anos de escolas municipais de área urbana. Rev Paul Pediatr 2010;28(1):48-54. |
| 1. Mendonça MRT, Silva MAMd, Rivera IR, et al. Prevalência de sobrepeso e obesidade em crianças e adolescentes da cidade de Maceió. Revista da Associação Médica Brasileira 2010;56(2):192-96. |
| 1. Cristina Egito de Menezes R. Consumo energético-protéico e estado nutricional de crianças menores de cinco anos no estado de pernambuco. Universidade Federal de Pernambuco, 2006. |
| 1. Molina MdCB, Faria CPd, Montero P, et al. Correspondence between children's nutritional status and mothers' perceptions: a population-based study. Cadernos de saude publica 2009;25(10):2285-90. |
| 1. Molina MdCB, Faria CPd, Montero MP, et al. Fatores de risco cardiovascular em crianças de 7 a 10 anos de área urbana, Vitória, Espírito Santo, Brasil. Cadernos de Saúde Pública 2010;26:909-17. |
| 1. Mondini L, Levy RB, Saldiva SRDM, et al. Prevalência de sobrepeso e fatores associados em crianças ingressantes no ensino fundamental em um município da região metropolitana de São Paulo, Brasil. Cadernos de Saúde Pública 2007;23(8):1825-34. |
| 1. Monego ET, Jardim PCBV. Determinantes de risco para doenças cardiovasculares em escolares. Arquivos brasileiros de cardiologia 2006;87(1):37-45. |
| 1. Moraes NLM. Fatores de risco associados ao sobrepeso e obesidade em escolares de Mutuípe-Bahia. |
| 1. Moraes LId, Nicola TC, Jesus JSAd, et al. High blood pressure in children and its correlation with three definitions of obesity in childhood. Arquivos brasileiros de cardiologia 2014;102(2):175-80. |
| 1. Moura AA, Silva MA, Ferraz MRT, et al. Prevalência de pressão arterial elevada em escolares e adolescentes de Maceió. Jornal de Pediatria 2004;80(1):35-40. |
| 1. Nascimento GG, Seerig LM, Vargas‐Ferreira F, et al. Are obesity and overweight associated with gingivitis occurrence in Brazilian schoolchildren? Journal of clinical periodontology 2013;40(12):1072-78. |
| 1. Nogueira RC. Prevalência de Sobrepeso e Obesidade em Escolares entre sete e 10 anos de idade da Rede Municipal de Porto Alegre-RS. 2009 |
| 1. Pazdziora A, Guimarães L, Barros M, et al. Association between the nutritional status of school children and the nutritional status of their parents. Nutrire-Revista da Sociedade Brasileira de Alimentação e Nutrição 2009;34(1):45-57. |
| 1. Pazin DC, Rosaneli CF, Olandoski M, et al. Circunferência da Cintura está Associada à Pressão Arterial em Crianças com Índice de Massa Corpórea Normal: Avaliação Transversal de 3417 Crianças Escolares. Arquivos Brasileiros de Cardiologia 2017;109(6):509-15. |
| 1. Pinheiro AP, Giugliani ERJ. Who are the children with adequate weight who feel fat? Jornal de pediatria 2006;82(3):232-35. |
| 1. Pinho CPS, da Silva JEM, Silva ACG, et al. Avaliação antropométrica de crianças em creches do município de Bezerros, PE. Rev Paul Pediatr 2010;28(3):315-21. |
| 1. Pinto EF. Estado nutricional, desempenho motor e marcadores dermatoglíficos em escolares púberes. Universidade Federal do Rio Grande do Norte, 2009. |
| 1. Pitangueira JCD. Prevalência dos fatores de riscos metabólicos e o impacto da promoção de alimentação e estilo de vida saudáveis no controle do excesso de peso em escolares. |
| 1. Polla SF, Scherer F. Perfil alimentar e nutricional de escolares da rede municipal de ensino de um município do interior do Rio Grande do Sul. Cad Saúde Colet 2011;19(1):111-16. |
| 1. de Marins VR, Almeida RMV, Pereira RA, et al. The relationship between parental nutritional status and overweight children/adolescents in Rio de Janeiro, Brazil. Public Health 2004;118(1):43-49. |
| 1. Rech RR, Halpern R, Costanzi CB, et al. Prevalência de obesidade em escolares de 7 a 12 anos de uma cidade Serrana do RS, Brasil. Revista Brasileira de Cineantropometria & Desempenho Humano 2010;12(2):90-97. |
| 1. Ribas DL, Philippi ST, Tanaka ACdA, et al. Saúde e estado nutricional infantil de uma população da região Centro-Oeste do Brasil. Revista de Saúde Pública 1999;33:358-65. |
| 1. Ribeiro RQ, Lotufo PA, Lamounier JA, et al. Fatores adicionais de risco cardiovascular associados ao excesso de peso em crianças e adolescentes: o estudo do coração de Belo Horizonte. Arquivos Brasileiros de Cardiologia 2006;86(6):408-18. |
| 1. Rosaneli CF, Auler F, Manfrinato CB, et al. Avaliação da prevalência e de determinantes nutricionais e sociais do excesso de peso em uma população de escolares: análise transversal em 5.037 crianças. Revista da Associação Médica Brasileira 2012;58(4):472-76. |
| 1. Rosaneli CF, Baena CP, Auler F, et al. Elevated blood pressure and obesity in childhood: a cross-sectional evaluation of 4,609 schoolchildren. Arquivos brasileiros de cardiologia 2014;103(3):238-44. |
| 1. Rossi CE, Vasconcelos FdAGd. Relationship between birth weight and overweight/obesity among students in Florianópolis, Santa Catarina, Brazil: a retrospective cohort study. Sao Paulo Medical Journal 2014;132(5):273-81. |
| 1. Santos NHAd, Fiaccone RL, Barreto ML, et al. Association between eating patterns and body mass index in a sample of children and adolescents in Northeastern Brazil. Cadernos de saude publica 2014;30:2235-45. |
| 1. Seki M, Matsuo T, Carrilho AJF. Prevalence of metabolic syndrome and associated risk factors in Brazilian schoolchildren. Public health nutrition 2009;12(7):947-52. |
| 1. Silva MAMd, Rivera IR, Ferraz MRMT, et al. Prevalência de fatores de risco cardiovascular em crianças e adolescentes da rede de ensino da cidade de Maceió. Arquivos Brasileiros de Cardiologia 2005;84(5):387-92. |
| 1. Silva DA. Prevalência de sobrepeso e obesidade em pré-escolares de alto nível sócioeconômico da cidade de aracaju-se. Medicina (Ribeirao Preto Online) 2008;41(2):177-81. |
| 1. Silva KEdS, Pelegrini A, Pinto AdA, et al. Nutritional status of schoolchildren aged 7-10 years enrolled in public and private schools of Cascavel, Paraná, Brazil. Rev Nutr 2016;29(5):699-708. |
| 1. Souza MGBd, Rivera IR, Silva MAMd, et al. Relação da obesidade com a pressão arterial elevada em crianças e adolescentes. Arquivos brasileiros de cardiologia 2010;94(6):714-19. |
| 1. Tomé F, Cardoso V, Barbieri M, et al. Are birth weight and maternal smoking during pregnancy associated with malnutrition and excess weight among school age children? Brazilian Journal of Medical and Biological Research 2007;40(9):1221-30. |
| 1. Triches RM, Giugliani ERJ. Insatisfação corporal em escolares de dois municípios da região Sul do Brasil. Rev Nutr 2007;20(2):119-28. |
| 1. Vieira MdFA, Araújo CLP, Hallal PC, et al. Estado nutricional de escolares de 1ª a 4ª séries do Ensino Fundamental das escolas urbanas da cidade de Pelotas, Rio Grande do Sul, Brasil. Cadernos de Saúde Pública 2008;24:1667-74. |
| 1. Vilella M, de Oliveira Costa GN, Barreto ML, et al. Effect of dietary consumption as a modifier on the association between FTO gene variants and excess body weight in children from an admixed population in Brazil: the Social Changes, Asthma and Allergy in Latin America (SCAALA) cohort study. British Journal of Nutrition 2017;117(11):1503-10. |
| 1. Quadros TMBd, Gordia AP, Andaki ACR, et al. Triagem da pressão arterial elevada em crianças e adolescentes de Amargosa, Bahia: utilidade de indicadores antropométricos de obesidade. Revista brasileira de epidemiologia 2019;22:e190017. |
| 1. Valois Pedrosa I. Excesso de peso e fatores associados em escolares do município de Camaragibe-PE, 2004. Universidade Federal de Pernambuco, 2010. |
| 1. Burgos MS, Reuter CP, Burgos LT, et al. Uma análise entre índices pressóricos, obesidade e capacidade cardiorrespiratória em escolares. Arquivos Brasileiros de Cardiologia 2010;94(6):788-93. |
| 1. Burgos MS, Reuter CP, Possuelo LG, et al. Obesity parameters as predictors of early development of cardiometabolic risk factors. Ciencia & saude coletiva 2015;20:2381-88. |
| 1. Reis LN, Renner JD, Reuter CP, et al. Hyperuricemia is associated with low cardiorespiratory fitness levels and excess weight in schoolchildren. Jornal de Pediatria 2017;93(5):538-43. |
| 1. Reuter CP, Burgos MS, Bernhard JC, et al. Association between overweight and obesity in schoolchildren with rs9939609 polymorphism (FTO) and family history for obesity. Jornal de Pediatria (Versão em Português) 2016;92(5):493-98. |
| 1. Reuter C, Burgos L, Camargo M, et al. Prevalência de obesidade e risco cardiovascular em crianças e adolescentes do município de Santa Cruz do Sul, Rio Grande do Sul. Medicine Journal 2013;131(5) |
| 1. Sehn AP, Reuter CP, Kern DG, et al. Perfil sociodemográfico associado em nível de aptidão física relacionada à saúde em escolares. Saúde e Pesquisa ISSN 2176-9206 2017;10(1):75-82. |
| 1. Todendi PF, Klinger EI, Ferreira MB, et al. Association of IL-6 and CRP gene polymorphisms with obesity and metabolic disorders in children and adolescents. Anais da Academia Brasileira de Ciências 2015;87(2):915-24. |
| 1. Reuter ÉM, Reuter CP, Burgos LT, et al. Obesidade e hipertensão arterial em escolares de Santa Cruz do Sul-RS, Brasil. Revista da Associação Médica Brasileira 2012;58(6):666-72. |
| 1. Reuter CP, Silva PTd, Renner JDP, et al. Dislipidemia associa-se com falta de aptidão e sobrepeso-obesidade em crianças e adolescentes. Arquivos Brasileiros de Cardiologia 2016;106(3):188-93. |
| 1. Reuter CP, Rosane De Moura Valim A, Gaya AR, et al. FTO polymorphism, cardiorespiratory fitness, and obesity in B razilian youth. American journal of human biology 2016;28(3):381-86. |
| 1. Reuter CP, Burgos MS, Barbian CD, et al. Comparison between different criteria for metabolic syndrome in schoolchildren from southern Brazil. European Journal of Pediatrics 2018;177(10):1471-77. |
| 1. Reuter CP, Brand C, Silva PTd, et al. Relação entre Dislipidemia, Fatores Culturais e Aptidão Cardiorrespiratória em Escolares. Arquivos Brasileiros de Cardiologia 2019;112(6):729-36. |
| 1. Francesquet M, Silva PTd, Schneiders LdB, et al. Youth overweight/obesity and its relationship with cardiovascular disease and parental risk factors. Archives of endocrinology and metabolism 2019;63(4):411-16. |
| 1. Ortelan N. Avaliação da alimentação de lactentes menores de um ano nascidos com baixo peso: estudo transversal em 64 municípios brasileiros. Universidade de São Paulo, 2018. |
| 1. Reuter CP, de Mello ED, da Silva PT, et al. Overweight and obesity in schoolchildren: hierarchical analysis of associated demographic, behavioral, and biological factors. Journal of Obesity 2018;2018 |
| **Lack of sample representativeness (n = 100)** |
| 1. Andaki ACR, Tinôco ALA, Mendes EL, et al. Anthropometry and physical activity level in the prediction of metabolic syndrome in children. Public health nutrition 2014;17(10):2287-94. |
| 1. Araujo AMd, Brandão SAdSM, Araújo MAdM, et al. Overweight and obesity in preschoolers: Prevalence and relation to food consumption. Revista Da Associação Médica Brasileira 2017;63(2):124-33. |
| 1. Araujo C, Hallal P, Nader G, et al. Effect of birth size and proportionality on BMI and skinfold thickness in early adolescence: prospective birth cohort study. European journal of clinical nutrition 2009;63(5):634-39. |
| 1. Assunção ML, Ferreira HS, Coutinho SB, et al. Protective effect of breastfeeding against overweight can be detected as early as the second year of life: a study of children from one of the most socially-deprived areas of Brazil. Journal of health, population, and nutrition 2015;33(1):85. |
| 1. Belo MPM. Inluência do aleitamento materno no crescimento de crianças. Universidade Federal de Pernambuco, 2014. |
| 1. Benini D, Possa G, Artifon M, et al. Relationship of Waist Circumference with Lipid and Glucose Metabolism among Southern Brazilian Children. 2017;Volume 6 |
| 1. Bertotto ML, Valmórbida J, Broilo MC, et al. Associação entre ganho de peso no primeiro ano de vida com excesso de peso e adiposidade abdominal na idade pré-escolar. Rev Paul Pediatr 2012;30(4):507-12. |
| 1. Borges CQ, Silva RdCR, Assis AMO, et al. Fatores associados à anemia em crianças e adolescentes de escolas públicas de Salvador, Bahia, Brasil. Cadernos de Saúde Pública 2009;25:877-88. |
| 1. Boscaini C, Pellanda LC. Birth weight, current anthropometric markers, and high sensitivity C-reactive protein in Brazilian school children. Journal of Obesity 2015;2015 |
| 1. Cabrera TFC, Correia IFL, dos Santos DO, et al. Análise da prevalência de sobrepeso e obesidade e do nível de atividade física em crianças e adolescentes de uma cidade do sudoeste de São Paulo. Journal of Human Growth and Development 2014;24(1):67-72. |
| 1. Soares Caldeira KM, Pacheco de Souza JM, Buongermino de Souza S. Excesso de peso e sua relação com a duração do aleitamento materno em pré-escolares. Revista Brasileira de Crescimento e Desenvolvimento Humano 2015;25(1) |
| 1. Camargo MZ. Postura e obesidade infantil: análise do alinhamento no plano sagital em pré-escolares. 2013 |
| 1. de Carvalho AT, Rodrigues de Almeida E, Fernandes Nilson EA, et al. Situação nutricional de crianças menores de cinco anos em municípios do nordeste brasileiro. Revista Brasileira de Crescimento e Desenvolvimento Humano 2014;24(2) |
| 1. Cobayashi F, Augusto RA, Lourenço BH, et al. Factors associated with stunting and overweight in Amazonian children: a population-based, cross-sectional study. Public health nutrition 2014;17(3):551-60. |
| 1. Corso ACT, Viteritte PL, Peres MA. Prevalência de sobrepeso e sua associação com a área de residência em crianças menores de 6 anos de idade matriculadas em creches públicas de Florianópolis, Santa Catarina, Brasil. Revista Brasileira de Epidemiologia 2004;7(2):201-09. |
| 1. Costanzi CB, Halpern R, Rech RR, et al. Associated factors in high blood pressure among schoolchildren in a middle size city, southern Brazil. J Pediatr (Rio J) 2009;85(4):335-40. |
| 1. Alcântara Neto ODd, Silva RdCR, Assis AMO, et al. Fatores associados à dislipidemia em crianças e adolescentes de escolas públicas de Salvador, Bahia. Revista Brasileira de Epidemiologia 2012;15(2):335-45. |
| 1. de Almeida PCD, da Silva JP, Carreiro Pinasco G, et al. Perfil lipídico em escolares de Vitória-Brasil. Revista Brasileira de Crescimento e Desenvolvimento Humano 2016;26(1) |
| 1. Assis M. Ambiente alimentar residencial e obesidade em crianças e adolescentes de uma cidade de médio porte brasileira [Dissertação de Mestrado]. Juiz de Fora: Faculdade de Medicina, Universidade Federal de Juiz de Fora 2017 |
| 1. de Carvalho Cremm E, Leite FHM, de Abreu DSC, et al. Factors associated with overweight in children living in the neighbourhoods of an urban area of Brazil. Public health nutrition 2012;15(6):1056-64. |
| 1. Souza MCCd, Tibúrcio JD, Bicalho JMF, et al. Fatores associados à obesidade e sobrepeso em escolares. Texto & Contexto-Enfermagem 2014;23(3):712-19. |
| 1. Pitangueira JCD, Silva LR, de Santana MLP, et al. Metabolic syndrome and associated factors in children and adolescents of a Brazilian municipality. Nutricion hospitalaria 2014;29(4):865-72. |
| 1. Fernandes MdM, Penha DSG, Braga FdA. Obesidade infantil em crianças da rede pública de ensino: prevalência e consequências para flexibilidade, força explosiva e velocidade. Revista da Educação Física/UEM 2012;23(4):629-34. |
| 1. Ferreira AP, Nóbrega OdT, França NMd. Associação do índice de massa corporal e da resistência à insulina com síndrome metabólica em crianças brasileiras. Arquivos Brasileiros de Cardiologia 2009;93(2):147-53. |
| 1. Flores LS, Gaya AR, Petersen RD, et al. Trends of underweight, overweight, and obesity in Brazilian children and adolescents. Jornal de pediatria 2013;89(5):456-61. |
| 1. Fraga L, Sampaio A, Boa-Sorte N, et al. Obesity and lower urinary tract dysfunction in children and adolescents: Further research into new relationships. Journal of pediatric urology 2017;13(4):387. e1-87. e6. |
| 1. Gonçalves-Silva R, Valente JG, Lemos-Santos MG, et al. Tabagismo no domicílio e baixa estatura em menores de cinco anos. Cadernos de Saúde Pública 2005;21:1540-49. |
| 1. Pedroso J, Toral N, Gubert MB. Maternal perception of children's nutritional status in the Federal District, Brazil. PloS one 2017;12(4):e0176344. |
| 1. Krause AB. Excesso de peso e sua relação com condições socioeconômicas da área de moradia de crianças assistidas por escolas públicas de educação infantil de Porto Alegre. 2013 |
| 1. Leone C, Nascimento VG, Costa da Silva JP, et al. Razão cintura/estatura: marcador de alteração nutricional em pré-escolares. Revista Brasileira de Crescimento e Desenvolvimento Humano 2014;24(3) |
| 1. Lourenco BH, Cardoso MA, Team AS. C-reactive protein concentration predicts change in body mass index during childhood. PloS one 2014;9(3):e90357. |
| 1. Lourenço BH, Villamor E, Augusto RA, et al. Influence of early life factors on body mass index trajectory during childhood: a population‐based longitudinal analysis in the W estern B razilian A mazon. Maternal & child nutrition 2015;11(2):240-52. |
| 1. Machado DT. Perfil da aptidão física relacionada à saúde de escolares brasileiros avaliados pelo projeto Esporte Brasil: um estudo de tendência de 2003 a 2011. 2012 |
| 1. Machado TC, Nascimento VG, da Silva JP, et al. Body composition of preschool children and relation to birth weight. Revista Da Associação Médica Brasileira 2014;60(2):139-44. |
| 1. Martins CEB, Ribeiro RR, Barros Filho AdA. Estado nutricional de escolares segundo a localização geográfica das escolas em Sorocaba, São Paulo. Rev Paul Pediatr 2010;28(1):55-62. |
| 1. Martins V, Sousa R, Rocha E, et al. Dental trauma among Brazilian schoolchildren: prevalence, treatment and associated factors. European Archives of Paediatric Dentistry 2012;13(5):232-37. |
| 1. Martins VM, Sousa RV, Rocha ES, et al. Assessment of the association between overweight/obesity and traumatic dental injury among Brazilian schoolchildren. Acta odontológica latinoamericana 2014;27(1):26-32. |
| 1. Mazaro IAR, de Lurdes Zanolli M, Antonio MÂR, et al. Obesity and cardiovascular risk factors in school children from Sorocaba, SP. Revista da Associação Médica Brasileira (English Edition) 2011;57(6):660-66. |
| 1. Melzer MRTF, Magrini IM, Domene SMÁ, et al. Factors associated with abdominal obesity in children. Rev Paul Pediatr (English Edition) 2015;33(4):437-44. |
| 1. Cristina Egito de Menezes R. Evolução e determinantes da desnutrição e do excesso de peso em crianças no Estado de Pernambuco. 2011 |
| 1. Menossi BRdS. Critérios de classificação do índice de massa corporal e capacidades motoras: um estudo em crianças e adolescentes obesos e eutróficos brasileiros. 2016 |
| 1. Mitchell JA, Dowda M, Pate RR, et al. Physical activity and pediatric obesity: a quantile regression analysis. Medicine and science in sports and exercise 2017;49(3):466. |
| 1. Moreira AC. Influências familiares e determinantes precoces na ocorrência da obesidade e do risco cardiovascular em crianças. 2010 |
| 1. Muraro AP, Gonçalves-Silva RMV, Ferreira MG, et al. Effects of social mobility from childhood to adolescence on BMI. Public Health Nutrition 2016;19(5):814-21. |
| 1. Nascimento VG, da Silva JPC, Ferreira PC, et al. Aleitamento materno, introdução precoce de leite não materno e excesso de peso na idade pré‐escolar. Rev Paul Pediatr 2016;34(4):454-59. |
| 1. Naghettini AV, Salgado CM, Freitas JS, et al. Identificando fatores de risco para desenvolvimento de Doença Renal Crônica entre escolares. Brazilian Journal of Nephrology 2012;34(3):278-82. |
| 1. Nascimento VG, Bertoli CJ, Leone C. Ratio of weight to height gain: a useful tool for identifying children at risk of becoming overweight or obese at preschool age. Clinics 2011;66(7):1223-26. |
| 1. Nascimento VG, Silva JPCd, Bertoli CJ, et al. Prevalence of overweight preschool children in public day care centers: a cross-sectional study. Sao Paulo Medical Journal 2012;130(4):225-29. |
| 1. Nogueira FdAM, Sichieri R. Associação entre consumo de refrigerantes, sucos e leite, com o índice de massa corporal em escolares da rede pública de Niterói, Rio de Janeiro, Brasil. Cadernos de Saúde Pública 2009;25(12):2715-24. |
| 1. Nogueira PCK, Costa RFd, Cunha JSN, et al. Pressão arterial elevada em escolares de Santos: relação com a obesidade. Revista da Associacao Medica Brasileira 2007;53(5):426-32. |
| 1. Nascimento VG, Schoeps DdO, Souza SBd, et al. Risco de sobrepeso e excesso de peso em crianças de pré-escolas privadas e filantrópicas. Revista da Associação Médica Brasileira 2011;57(6):657-61. |
| 1. Pedraza DF, Rocha ACD, Sousa CPdC. Crescimento e deficiências de micronutrientes: perfil das crianças assistidas no núcleo de creches do governo da Paraíba, Brasil. Ciência & Saúde Coletiva 2013;18:3379-90. |
| 1. Pedraza DF, Queiroz Dd, Paiva AdA, et al. Seguridad alimentaria, crecimiento y niveles de vitamina A, hemoglobina y zinc en niños preescolares del nordeste de Brasil. Ciência & Saúde Coletiva 2014;19:641-50. |
| 1. Pedraza DF, Silva FA, Melo NLSd, et al. Estado nutricional e hábitos alimentares de escolares de Campina Grande, Paraíba, Brasil. Ciência & saúde coletiva 2017;22:469-77. |
| 1. Figueroa Pedraza D. Preditores de riscos nutricionais de crianças assistidas em creches em município de porte médio do Brasil. Cadernos Saúde Coletiva 2017;25(1) |
| 1. Pedroso J, Toral N, Bauermann Gubert M. Maternal dissatisfaction with their children's body size in private schools in the Federal District, Brazil. PloS one 2018;13(10):e0204848. |
| 1. Pelegrini A, Silva DAS, Petroski EL, et al. Sobrepeso e obesidade em escolares brasileiros de sete a nove anos: dados do projeto Esporte Brasil. Rev Paul Pediatr 2010;28(3):290-95. |
| 1. Pereira JA, Rondo PHC, Lemos JO, et al. Nutritional status and lipid profile of young children in Brazil. Journal of tropical pediatrics 2013;59(1):54-58. |
| 1. Pereira-Freire JA, Lemos JO, de Sousa AF, et al. Association between weight at birth and body composition in childhood: a Brazilian cohort study. Early human development 2015;91(8):445-49. |
| 1. Pinto SL, Silva RdCR, Priore SE, et al. Prevalência de pré-hipertensão e de hipertensão arterial e avaliação de fatores associados em crianças e adolescentes de escolas públicas de Salvador, Bahia, Brasil. Cadernos de Saúde Pública 2011;27:1065-75. |
| 1. Queiroz VMd, Moreira PVL, Vasconcelos THCd, et al. Prevalence and anthropometric predictors of high blood pressure in schoolchildren from João Pessoa-PB, Brazil. Arquivos brasileiros de cardiologia 2010;95(5):629-34. |
| 1. Rocha RP. Estado nutricional de crianças no primeiro ano de vida do município da Vitória de Santo Antão, Pernambuco. Universidade Federal de Pernambuco, 2015. |
| 1. Rodrigues VC, Mendes BD, Gozzi A, et al. Deficiência de ferro, prevalência de anemia e fatores associados em crianças de creches públicas do oeste do Paraná, Brasil. Rev Nutr 2011;24(3):407-20. |
| 1. Santos PMd. Resistência à insulina e fatores de risco cardiovasculares associados à obesidade em escolares de Nova Era-MG. 2010 |
| 1. Schuch I. Sobrepeso em pré-escolares dos estados do Rio Grande do Sul e Santa Catarina: prevalencia e fatores associados. 2011 |
| 1. Schuch I, de Castro TG, de Vasconcelos FdA, et al. Excess weight in preschoolers: prevalence and associated factors. Jornal de pediatria 2013;89(2):179-88. |
| 1. Silva KS, Lopes AS. Excesso de peso, pressão arterial e atividade física no deslocamento à escola. Arquivos Brasileiros de Cardiologia 2008;91(2):93-101. |
| 1. Silva LCB, Tassitano RM, de Medeiros HJ, et al. Excesso de peso e fatores comportamentais. Motricidade 2016;12:112. |
| 1. Silva DAS, Petroski EL, Gaya ACA. Secular changes in aerobic fitness levels in Brazilian children. Revista Brasileira de Medicina do Esporte 2017;23(6):450-54. |
| 1. Silva D, Pelegrini A, Petroski EL, et al. Comparison between the growth of Brazilian children and adolescents and the reference growth charts: data from a Brazilian project. J Pediatr (Rio J) 2010;86(2):115-20. |
| 1. Verçosa MdF. Crescimento somático e composição corporal em crianças dos 7 aos 10 anos: um estudo longitudinal-misto. Universidade Federal de Pernambuco, 2016. |
| 1. Vicenzi K, Henn RL, Weber AP, et al. Insegurança alimentar e excesso de peso em escolares do primeiro ano do Ensino Fundamental da rede municipal de São Leopoldo, Rio Grande do Sul, Brasil. Cadernos de Saúde Pública 2015;31:1084-94. |
| 1. Vitolo MR, Gama CM, Bortolini GA, et al. Some risk factors associated with overweight, stunting and wasting among children under 5 years old. Jornal de pediatria 2008;84(3):251-57. |
| 1. Cruz NRC, Cardoso PC, Frossard TNSV, et al. Waist circumference as high blood pressure predictor in school age children. Ciencia & saude coletiva 2019;24:1885-93. |
| 1. Andreasi V, Michelin E, Rinaldi AEM, et al. Physical fitness and associations with anthropometric measurements in 7 to 15-year-old school children. Jornal de pediatria 2010;86(6):497-502. |
| 1. Araujo D, Marquezin M, Barbosa T, et al. Assessment of quality of life, anxiety, socio‐economic factors and caries experience in Brazilian children with overweight and obesity. International journal of dental hygiene 2017;15(4):e156-e62. |
| 1. Bergmann GG, Bergmann MLdA, Pinheiro EdS, et al. Índice de massa corporal: tendência secular em crianças e adolescentes brasileiros. Revista Brasileira de Cineantropometria & Desempenho Humano Vol 11, n 3 (2009), p 280-285 2009 |
| 1. Bergmann MLdA, Bergmann GG, Halpern R, et al. Colesterol total e fatores associados: estudo de base escolar no sul do Brasil. Arquivos Brasileiros de Cardiologia 2011;97(1):17-25. |
| 1. Brasil LdMP, Fisberg M, Maranhão HdS. Excesso de peso de escolares em região do Nordeste Brasileiro: contraste entre as redes de ensino pública e privada. Revista brasileira de saúde materno infantil 2007;7(4):405-12. |
| 1. Castilho SD, Bento CA, Pinheiro CD, et al. Trends of body composition among adolescents according to maturation stage and body mass index. Journal of Pediatric Endocrinology and Metabolism 2013;26(7-8):651-56. |
| 1. dos Santos Farias E, Petroski EL. Nutritional status and physical activity of scholars of the city of Porto Velho, Rondônia. Brazilian Journal of Kinanthropometry and Human Performance 2003;5(1):27-38. |
| 1. Farias E, Guerra Jr G, Petroski EL. Nutritional Status Of Schoolchildren In Porto Velho, Rondônia, Brazil [estado Nutricional De Escolares Em Porto Velho, Rondônia]. Revista de Nutricao 2008 |
| 1. Freitas Júnior IF, Balikian Júnior P, Miyashita LK, et al. Crescimento e estado nutricional de crianças e adolescentes de Presidente Prudente, São Paulo, Brasil. Revista Brasileira de Saúde Materno Infantil 2008:265-74. |
| 1. Jardim-Botelho A, Queiroz Gurgel R, Petrucci R, et al. Infant overweight as early marker of childhood overweight in Brazil. Journal of tropical pediatrics 2014;60(1):47-52. |
| 1. Jardim-Botelho A, Queiroz Gurgel R, Simeone Henriques G, et al. Micronutrient deficiencies in normal and overweight infants in a low socio-economic population in north-east Brazil. Paediatrics and international child health 2016;36(3):198-202. |
| 1. Cunha HP, Caetano R, Oliveira M, et al. Increased levels and prevalence of small dense ldl particles and insulin resistance in overweight, obese and abdominally obese children and adolescents: W366. Clinical Chemistry and Laboratory Medicine 2015;53 |
| 1. Cunha HP, Rosini N, Caetano R, et al. Assessment of cardiometabolic risk factors in children and adolescents from Botuverá-SC, southern Brazil: M140. Clinical Chemistry and Laboratory Medicine 2015;53 |
| 1. Cunha HP, Rosini N, Caetano R, et al. Increased cardiometabolic risk factors in overweight, obese and abdominally obese children and adolescents or abdominal obesity: W362. Clinical Chemistry and Laboratory Medicine 2015;53 |
| 1. Cunha HP, Rosini N, Caetano R, et al. Metabolic syndrome in children and adolescents from a semirural city in southern Brazil: W363. Clinical Chemistry and Laboratory Medicine 2015;53 |
| 1. Pozza FS, Nucci LB, Enes CC. Identifying overweight and obesity in Brazilian schoolchildren, 2014. Journal of Public Health Management and Practice 2018;24(3):204-10. |
| 1. Ribas SA, Silva LCSd. Dislipidemia em escolares na rede privada de Belém. Arquivos Brasileiros de Cardiologia 2009;92(6):446-51. |
| 1. Ribas S, da Silva LS. Anthropometric indices; predictors of dyslipidemia in children and adolescents from north of Brazil. Nutricion hospitalaria 2012;27(4):1228-35. |
| 1. Ribas SA, Silva LCSd. Fatores de risco cardiovascular e fatores associados em escolares do Município de Belém, Pará, Brasil. Cadernos de Saúde Pública 2014;30:577-86. |
| 1. Ribeiro BVdS, Mendonça RGd, Oliveira LLd, et al. Antropometria e estilo de vida de crianças e adolescentes no interior do Nordeste do Brasil. Rev bras crescimento desenvolv hum 2017:140-47. |
| 1. Rosini N, Machado MJ, Webster IZ, et al. Simultaneous prediction of hyperglycemia and dyslipidemia in school children in Santa Catarina State, Brazil based on waist circumference measurement. Clinical biochemistry 2013;46(18):1837-41. |
| 1. Santos BR, Mascarenhas LP, Satler F, et al. Vitamin D deficiency in girls from South Brazil: a cross-sectional study on prevalence and association with vitamin D receptor gene variants. BMC pediatrics 2012;12(1):1-7. |
| 1. Sousa CPdC, Sousa MPdC, Rocha ACD, et al. Perfil epidemiológico do estado nutricional de crianças assistidas em creches no Estado da Paraíba. Nutrire Rev Soc Bras Aliment Nutr 2011 |
| 1. Maria Fonseca Pereira Oliveira Gomes S. Impactos do Programa Nacional de Alimentação Escolar PNAE sobre a nutrição dos alunos, defasagem e desempenho escolar. 2009 |
| 1. Saldiva SRDM, Escuder MML, Venâncio SI, et al. Prevalence of obesity in preschool children from five towns in São Paulo State, Brazil. Cadernos de saude publica 2004;20(6):1627-32. |
| 1. Saldiva SRDM, Escuder M, Venâncio SI, et al. Is overweight a risk factor for wheezing in pre-school children? A study in 14 Brazilian communities. Public health nutrition 2007;10(9):878-82. |
| **Full text not available (n= 11)** |
| 1. Costa P, Kinra S, D'Almeida V, et al. Serum homocysteine and cysteine levels and associated factors in children and adolescents. Nutricion Clinica Y Dietetica Hospitalaria 2017;37(1):106-16. |
| 1. Ferreira S, Nobre L, Silva K, et al. Dietary patterns and alteration in body weight in preschoolers: 900 accepted poster. Obesity facts 2012;5 |
| 1. Ferreira S, Nobre L, Silva K, et al. Factors associated with overweight among brazilian preschool children: 905 accepted poster. Obesity facts 2012;5 |
| 1. Franceschini S, Ribeiro S, Sant'Ana L, et al. Influence of lifestyle habits on nutritional status and body composition in children 4–7 years of age: PS036. European Journal of Clinical Nutrition 2015;69 |
| 1. Bruna L. Maciel MLM, Noélia L. Lima, Alberto M. Soares, Isabelle F. Cruz, Cláudia B. Abreu, Richard L. Guerrant, Aldo A. Lima. A cohort study on breastfeeding and early infant feeding practices in the first six months of life in Fortaleza, Ceará, Brazil. The American Society of Tropical Medicine and Hygiene, 2014:p. 380-457. |
| 1. Pereira A, Martinez T, Sposito A, et al. P806 evaluation of protein c highly sensitive children and adolescents in municipality of Itapetininga-Brazil. Atherosclerosis (Supplements)(Component) 2009;2(10):e983. |
| 1. Zollner Salvador CC, Kitoko PM, Gambardella AMD. Estado nutricional de crianças e adolescentes: fatores associados ao excesso de peso e acúmulo de gordura. Revista Brasileira de Crescimento e Desenvolvimento Humano 2014;24(3) |
| 1. Rossi C, de Vasconcelos G. Birth weight and obesity in 7-14-y-old schoolchildren of florianopolis city-south of brazil: PO1142. Annals of Nutrition and Metabolism 2013;63:813-14. |
| 1. Saraiva JJFK, Saraiva D, Cesar L, et al. Prevalence of weight excess in a young student population: P607. European Journal of Preventive Cardiology 2014;21(1) |
| 1. Silveira J, Cocetti M, Colugnati F, et al. Environmental factors associated with overweight in brazilian preschool children.: PO1130. Annals of Nutrition and Metabolism 2013;63 |
| 1. Vieira SA, Magalhães TCA, Ribeiro AQ, et al. Influence of weight gain rate on early life nutritional status and body composition of children. The Scientific World Journal 2014;2014 |
| **The dataset did not contain childhood obesity data (n= 2)** |
| 1. IBGE. Pesquisa Nacional Sobre Demografia e Saude, 1991. |
| 1. IBGE. Pesquisa Nacional Sobre Demografia e Saude, 1986. |

**Supplementary Material 3 - Characteristics of the included studies.**

| **Study** | **Year** | **Study design** | **Location (city, state or country)** | **Age group (year)** | **Sample source** | **Sample coverage** | **Population (n)** | **Quality score** |
| --- | --- | --- | --- | --- | --- | --- | --- | --- |
| Alexius 2012[17] | 2007 | Cross-sectional | Medianeira, PR | 6-9 | School-based | Public and private | 1,047 | 5 |
| Andaki 2017[18] | 2009-2011 | Cross-sectional | Uberaba, MG | 6-9 | School-based | Public and private | 1,583 | 4 |
| Ataíde Lima 2015[19] | 2008-2010 | Cross-sectional | João Pessoa, PB | 0-9 | Population-based | Household | 203 | 5 |
| Barbosa 2009[20] | 2008-2009 | Cross-sectional | Diamantina, MG | 7-9 | School-based | Public and private | 209 | 7 |
| Barbosa Filho 2016[21] | 2012 | Cross-sectional | Colombo, PR | 6-9 | School-based | Public and private | 1,537 | 7 |
| Barreto 2007[22] | 2004 | Cross-sectional | Natal, RN | 2-6 | School-based | Public and private | 3,714 | 5 |
| Bernardo 2012[23] | 2007 | Cross-sectional | Florianópolis, SC | 7-9 | School-based | Public and private | 898 | 8 |
| Berria 2013[25] | 2006 | Cross-sectional | Cascavel, PR | 8-9 | School-based | Public and private | 665**a** | 5 |
| Bertin 2010[24] | 2009 | Cross-sectional | Indaial, SC | 8-9 | School-based | Public | 259 | 6 |
| Borges 2007[26] | 2004-2005 | Cross-sectional | Ponta Grossa, PR | 6-9 | School-based | Public | 637 | 5 |
| Castilho 2014[27] | 2010-2012 | Cross-sectional | Campinas, SP | 7-9 | School-based | Public and private | 1113 | 6 |
| Chagas 2013[28] | 2006-2007 | Cross-sectional | São Luis, Imperatriz, Caxias, Codó, São José de Ribamar e Timon, MA | 0-5 | Population-based | Household | 1,176 | 7 |
| Coelho 2012[29] | 2006 | Cross-sectional | Ouro Preto, MG | 6-9 | School-based | Public and private | 247 | 6 |
| Costa 2015[30] | 2012-2013 | Cross-sectional | Florianópolis, SC | 7-9 | School-based | Public and private | 1,138 | 7 |
| Dallabona 2010[31] | 2007-2008 | Cross-sectional | Balneário Camboriú, SC | 0-6 | School-based | Public and private | 493 | 8 |
| Dumith 2010[32] | 2004 | Cross-sectional | Rio Grande, RS | 7-9 | School-based | Public and private | 145 | 6 |
| Feltrin 2015[33] | 2007-2008 | Cross-sectional | Blumenau, Jaragua do Sul, Lages, Criciúma, Florianópolis, Joinville, Chapecó e Joaçaba, SC | 6-9 | School-based | Public and private | 4,086 | 6 |
| Fernandez 2017[34] | 2010 | Cross-sectional | Pelotas, RS | 8-9 | School-based | Public and private | 494 | 7 |
| Ferrari 2015[35] | 2012-2013 | Cross-sectional | São Caetano do Sul, SP | 9 | School-based | Public and private | 62 | 5 |
| Ferreira 2010[36] | 2007 | Cross-sectional | 20 cities, AL | 0-5 | Population-based | Household | 948 | 8 |
| Ferreira 2013[37] | 1992 | Cross-sectional | 20 cities, AL | 0-5 | Population-based | Household | 1,228 | 7 |
| Ferreira 2013[37] | 2005 | Cross-sectional | 20 cities, AL | 0-5 | Population-based | Household | 1,384 | 7 |
| Ferreira 2015[38] | 2012-2013 | Cross-sectional | Maceió, AL | 9 | School-based | Public and private | 502 | 5 |
| Fraiz 2019[39] | 2014 | Cross-sectional | Curitiba, PR | 4-5 | School-based | Public | 683 | 8 |
| Freitas 2015[40] | 2011-2012 | Cross-sectional | Goiânia, GO | 0-5 | Population-based | Household | 673 | 7 |
| Gigante 2013[41] | 1986 | Cohort | Pelotas, RS | 4 | Population-based | Maternity | 4,739 | 6 |
| Guedes 2011[42] | 2007 | Cross-sectional | Vale do Jequitinhonha, MG | 6-9 | School-based | Public and private | 1,839 | 7 |
| Heleno 2017[43] | 2014-2015 | Cross-sectional | Divinópolis, MG | 6-9 | School-based | Public | 202 | 6 |
| Justo 2012[44] | 2009-2010 | Cross-sectional | Santa Maria de Jetibá, ES | 7-9 | School-based | Public and private | 901 | 7 |
| Kupek 2016[45] | 2007 | Cross-sectional | Florianópolis, SC | 7-9 | School-based | Public and private | 876 | 8 |
| Leal 2017[46] | 2002 | Cross-sectional | Florianópolis, SC | 7-9 | School-based | Public and private | 2,936 | 7 |
| Menezes 2007[47] | 1997 | Cohort | Pelotas, RS | 4 | Population-based | Maternity | 1,243 | 5 |
| Moreira 2012[48] | 2007 | Cross-sectional | Região semi-árida, AL | 0-5 | Population-based | Household | 963 | 6 |
| Müller 2014[49] | 2008 | Cross-sectional | Urban areas of 100 municipalities in the 5 regions | 0-5 | Population-based | Household | 4,804 | 7 |
| Nobre 2013[50] | 2009-2010 | Cross-sectional | Diamantina, MG | 5 | Population-based | Maternity | 232 | 6 |
| Nogueira 2014[51] | 2012 | Cross-sectional | Ourinhos, SP | 6-9 | School-based | Public | 2,572 | 3 |
| Oliveira 2003[52] | 2001 | Cross-sectional | Feira de Santana, BA | 4-9 | School-based | Public and private | 676 | 5 |
| Oliveira 2015[53] | 2011 | Cross-sectional | Feira de Santana, BA | 5-9 | School-based | Public and private | 713 | 3 |
| Opptiz 2014[54] | 2008 | Cross-sectional | Anísio de Abreu e Caracol, PI | 0-5 | Population-based | Household | 1,640 | 5 |
| PNDS 2006[67] | 2006 | Cross-sectional | Brasil | 0-9 | Population-based | Household | 5,828 | 8 |
| POF 2003[66] | 2003 | Cross-sectional | Brasil | 2-9 | Population-based | Household | 29,437 | 8 |
| POF 2009[65] | 2009 | Cross-sectional | Brasil | 2-9 | Population-based | Household | 26,541 | 8 |
| PPV 1997[64] | 1997 | Cross-sectional | Brasil | 0-9 | Population-based | Household | 3,103 | 8 |
| Pretto 2014[55] | 2011 | Cohort | Pelotas, RS | 8 | Population-based | Maternity | 616 | 6 |
| Ramalho 2013[56] | 2003 | Cross-sectional | Assis Brasil, AC | 0-5 | Population-based | Household | 199 | 8 |
| Ramalho 2013[56] | 2010 | Cross-sectional | Assis Brasil, AC | 0-5 | Population-based | Household | 378 | 8 |
| Rocha 2019[63] | 2015 | Cross-sectional | Viçosa, MG | 8-9 | School-based | Public and private | 378 | 7 |
| Salomons 2007[57] | 2006 | Cross-sectional | Arapoti, PR | 6-9 | School-based | Public | 1,384 | 6 |
| Santos 2019[58] | 2004 | Cohort | Pelotas, RS | 6 | Population-based | Maternity | 3,109 | 9 |
| Silva 2018[59] | 2012-2013 | Cross-sectional | Uberaba, MG | 5-9 | School-based | Public and private | 341 | 7 |
| Strufaldi 2011[60] | 2006 | Cross-sectional | Embu das Artes, SP | 6-9 | School-based | Public | 684 | 6 |
| Travi 2012[61] | 2006 | Cross-sectional | Campo Grande, MS | 6-9 | School-based | Public and private | 589 | 7 |
| Villa 2014[62] | 2012-2013 | Cross-sectional | Viçosa, MG | 8-9 | School-based | Public and private | 348 | 7 |

**a** Study included only girls.
